# Supplementary material for: Medical specialty preferences in early medical school training in Canada
Source: PubMed Central journal article supplement (PMC5694695; doi:10.5116/ijme.59f4.3c15), 2017-11-14
Supplement: ijme-8-400-S1.pdf [file ijme-8-400-S1.pdf]

Appendix A. Questionnaire

**Demographics**

1. Gender: (please circle one)
  - a. Male      b. Female
2. Marital status: (please circle one)
  - a. Single      b. In a serious relationship      c. Married
3. Age: please write your age below  
 .....
4. Medical education stream: (please circle one)
  - a. English      b. French
5. Home town population: (please circle one)
  - a. large (population 100,000+)
  - b. medium (population 30,000-99,999)
  - c. small (population 1-29,999)
6. Current specialty of interest: (Please rank your top 3 choices from 1= first choice to 3= third choice)
 

|                                                                                                                                                                                                                                                                                                                                                                                                                                                                                                                                                                                                                                                                                                                                              |                                                                                                                                                                                                                                                                                                                                                                                                                                                                                                                                                                                                                                      |
|----------------------------------------------------------------------------------------------------------------------------------------------------------------------------------------------------------------------------------------------------------------------------------------------------------------------------------------------------------------------------------------------------------------------------------------------------------------------------------------------------------------------------------------------------------------------------------------------------------------------------------------------------------------------------------------------------------------------------------------------|--------------------------------------------------------------------------------------------------------------------------------------------------------------------------------------------------------------------------------------------------------------------------------------------------------------------------------------------------------------------------------------------------------------------------------------------------------------------------------------------------------------------------------------------------------------------------------------------------------------------------------------|
| <input type="checkbox"/> Anesthesiology<br><input type="checkbox"/> Cardiac surgery<br><input type="checkbox"/> Dermatology<br><input type="checkbox"/> Diagnostic radiology<br><input type="checkbox"/> Emergency medicine<br><input type="checkbox"/> Family Medicine<br><input type="checkbox"/> General surgery<br><input type="checkbox"/> Internal medicine<br><input type="checkbox"/> Medical biochemistry<br><input type="checkbox"/> Medical genetics<br><input type="checkbox"/> Medical microbiology<br><input type="checkbox"/> Neurology<br><input type="checkbox"/> Neurosurgery<br><input type="checkbox"/> Nuclear medicine<br><input type="checkbox"/> Obstetrics and gynecology<br><input type="checkbox"/> Ophthalmology | <input type="checkbox"/> Orthopaedic surgery<br><input type="checkbox"/> Otolaryngology-Head and Neck Surgery<br><input type="checkbox"/> Pathology<br><input type="checkbox"/> Pediatrics<br><input type="checkbox"/> Physical medicine and rehabilitation<br><input type="checkbox"/> Plastic surgery<br><input type="checkbox"/> Psychiatry<br><input type="checkbox"/> Public health and preventive medicine<br><input type="checkbox"/> Radiation oncology<br><input type="checkbox"/> Transfusion medicine<br><input type="checkbox"/> Urology<br><input type="checkbox"/> Vascular surgery<br><input type="checkbox"/> Unsure |
|----------------------------------------------------------------------------------------------------------------------------------------------------------------------------------------------------------------------------------------------------------------------------------------------------------------------------------------------------------------------------------------------------------------------------------------------------------------------------------------------------------------------------------------------------------------------------------------------------------------------------------------------------------------------------------------------------------------------------------------------|--------------------------------------------------------------------------------------------------------------------------------------------------------------------------------------------------------------------------------------------------------------------------------------------------------------------------------------------------------------------------------------------------------------------------------------------------------------------------------------------------------------------------------------------------------------------------------------------------------------------------------------|
7. How confident are your choices in Question 6? (Please circle a number from 1 to 5)
  - 1=It will most likely change—I have not begun to explore the various career options yet
  - 5=It will not change-I am sure of the specialty I want to enter at this time in my training

1      2      3      4      5

**Factors influencing**

Please write a value for each question below from 0=not important/doesn't affect to 100=critical

| No. | Question Stem                                                                                                                                                                                  | Value<br>0-100 |
|-----|------------------------------------------------------------------------------------------------------------------------------------------------------------------------------------------------|----------------|
| 8   | Control/predictability over work schedule (for example: on-call, commitment to work)                                                                                                           |                |
| 9   | Expected financial income                                                                                                                                                                      |                |
| 10  | Intellectual content of the specialty                                                                                                                                                          |                |
| 11  | Scope of practice of the specialty                                                                                                                                                             |                |
| 12  | Future job market (for example: employment opportunities, ease of employment, demand of the specialty, job security)                                                                           |                |
| 13  | Length of training required to practice (for example: length of residency program, fellowships)                                                                                                |                |
| 14  | Job flexibility (for example: ease of job relocation, dependency on hospital resources [operating rooms], transferable, work location, career opportunities, opportunity for private practice) |                |
| 15  | Availability of residency training placements available/ Competition for obtaining a residency position (for example: specialty competitiveness)                                               |                |
| 16  | Characteristics of the patient population (for example: pediatrics, adult, geriatrics, acute/long-term care)                                                                                   |                |

|    |                                                                                                                                                      |  |
|----|------------------------------------------------------------------------------------------------------------------------------------------------------|--|
| 17 | Lifestyle during training                                                                                                                            |  |
| 18 | Lifestyle following training (for example: controllable, time for family, focus on other interests/hobbies)                                          |  |
| 19 | Influence of an attending physician's or resident's opinions and reflections (for example: advice, why they chose specialty, specialty satisfaction) |  |
| 20 | Perceived working environment (for example: stressful, high-pressure, fast-paced)                                                                    |  |
| 21 | Patient-physician interaction                                                                                                                        |  |
| 22 | Influence of a personal mentor or a teaching faculty member                                                                                          |  |
| 23 | Influence of family members and friends                                                                                                              |  |
| 24 | Prior knowledge or skill set in the specialty                                                                                                        |  |
| 25 | Clinical or educational exposure/experience into specialty                                                                                           |  |
| 26 | Debt and student loans that have been incurred before practicing medicine                                                                            |  |
| 27 | Job satisfaction                                                                                                                                     |  |
| 28 | Impact on the patient                                                                                                                                |  |
| 29 | Treatment outcomes of patients in the specialty (for example: palliative care versus cosmetic surgery)                                               |  |
| 30 | Future opportunities to progress or sub-specialize                                                                                                   |  |
| 31 | Gender distribution in specialty (for example: low prevalence of females in surgery)                                                                 |  |
| 32 | Personal fit into the specialty (for example: share the same interests, personality, skills and values as those in the field)                        |  |
| 33 | Opportunities to perform procedures/techniques                                                                                                       |  |
| 34 | Status/prestige of the specialty                                                                                                                     |  |

**Misc Questions**

35. Single most important factor from question 8-34:

(Please write question):

.....

36. Current knowledge of career counseling services available to you to help choose a medical specialty: (Please circle a number from 1 to 5)

- 1=I do not know of any resources available to me
- 5=I am aware of sufficient resources available to me

1      2      3      4      5

37. What would you like to see in terms of career counseling in medical school? (Please write any comments in the box)

38. Any other comments you might have: (Please write any comments in the box)

I would like to be contacted for the possibility of participation in future studies

Yes - University of Ottawa Email address (i.e. AVO025@uottawa.ca): .....  
 No
